# Supplementary material for: Eczema Care Online: development and qualitative optimisation of an online behavioural intervention to support self-management in young people with eczema
Source: HighWire-hosted journal article supplement (doi:10.1136/bmjopen-2021-056867), 2022-04-01
Supplement: bmjopen-2021-056867supp005_data_supplement.pdf [file bmjopen-2021-056867supp005_data_supplement.pdf]

## Supplementary Material 5: Screenshot of page explaining the menu of different information topics and quotes from other young people with eczema

**Eczema Care Online**  
Self-help toolkit

To log out, please close ALL browser windows

### Introduction

← Back **What is Eczema Care Online?** Next →

#### What happens next?

The next few pages will give you key information about eczema and the best way to treat it. Page 2/9

#### Menu of Topics

Eczema Care Online  
Self-help toolkit

Home How to control eczema Moisturising creams What can make eczema worse? Living well with eczema More about treatments

← Back Menu of topics

Once you have seen the introduction, our menu of topics will appear at the top of your screen and you will be able to browse the whole website.

#### ECO quotes

Throughout ECO there will be quotes based on the tips and experiences that young people have shared with us. These have been checked by people with eczema to make sure they will be useful for you.

"I've been dealing with eczema for years and thought I knew it all, and was really surprised by the helpful new tips I found"  
Jordan

Back Next
