# Supplementary material for: Eczema Care Online: development and qualitative optimisation of an online behavioural intervention to support self-management in young people with eczema
Source: BMJ Open. 2022 Apr 19;12(4):e056867. doi: 10.1136/bmjopen-2021-056867 (PMC9021764; doi:10.1136/bmjopen-2021-056867)
Supplement: Supplementary data [file bmjopen-2021-056867supp004.pdf]

**Supplementary Material 4: Screenshot of simple eczema assessment and subsequent feedback on which of the core treatment modules (emollients or topical corticosteroids) would be most relevant depending on whether they were currently experiencing an eczema flare-up**

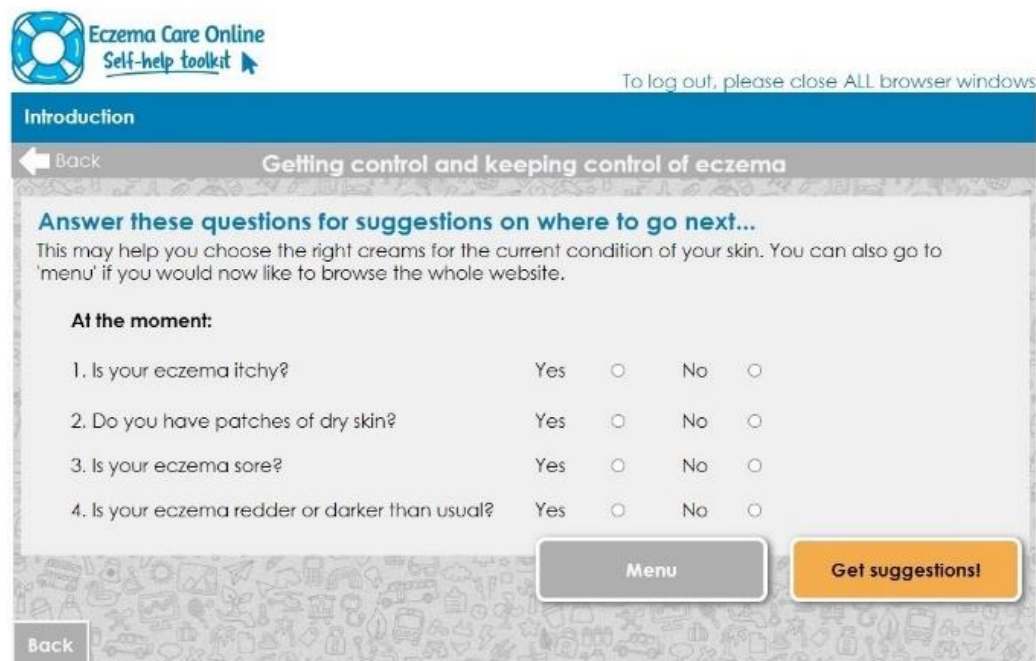

The screenshot shows the 'Eczema Care Online Self-help toolkit' interface. At the top, there is a logo and a navigation bar with 'Introduction' and 'Getting control and keeping control of eczema'. A 'Back' button is on the left. The main content area is titled 'Answer these questions for suggestions on where to go next...'. It explains that this helps choose the right creams for the current condition of the skin. Below this, there is a section 'At the moment:' with four questions, each with 'Yes' and 'No' radio button options:

|                                                |     |                       |    |                       |
|------------------------------------------------|-----|-----------------------|----|-----------------------|
| 1. Is your eczema itchy?                       | Yes | <input type="radio"/> | No | <input type="radio"/> |
| 2. Do you have patches of dry skin?            | Yes | <input type="radio"/> | No | <input type="radio"/> |
| 3. Is your eczema sore?                        | Yes | <input type="radio"/> | No | <input type="radio"/> |
| 4. Is your eczema redder or darker than usual? | Yes | <input type="radio"/> | No | <input type="radio"/> |

At the bottom of the questions, there are two buttons: 'Menu' and 'Get suggestions!'.

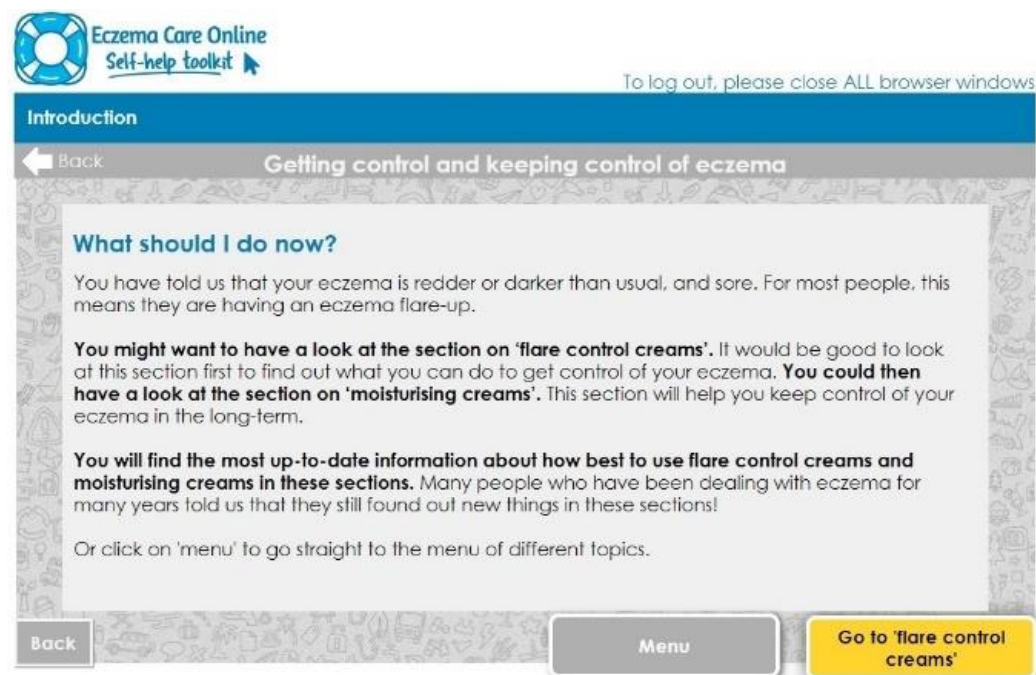

The screenshot shows the feedback screen of the 'Eczema Care Online Self-help toolkit'. It has the same header and navigation bar as the previous screen. The main content area is titled 'What should I do now?'. It provides feedback based on the user's answers, stating: 'You have told us that your eczema is redder or darker than usual, and sore. For most people, this means they are having an eczema flare-up.' It then suggests: 'You might want to have a look at the section on 'flare control creams'. It would be good to look at this section first to find out what you can do to get control of your eczema. You could then have a look at the section on 'moisturising creams'. This section will help you keep control of your eczema in the long-term.' It also states: 'You will find the most up-to-date information about how best to use flare control creams and moisturising creams in these sections. Many people who have been dealing with eczema for many years told us that they still found out new things in these sections!' At the bottom, it says: 'Or click on 'menu' to go straight to the menu of different topics.' There are three buttons at the bottom: 'Back', 'Menu', and 'Go to 'flare control creams''.
